# Supplementary material for: Lacunes and type 2 diabetes mellitus have a joint effect on cognitive impairment: a retrospective study
Source: PeerJ. 2022 Mar 3;10:e13069. doi: 10.7717/peerj.13069 (PMC8898547; doi:10.7717/peerj.13069)
Supplement: Supplemental Information 1 — The last column shows the Likert scale score for image quality assessment. [file peerj-10-13069-s001.xlsx]

## Sheet: Sheet1
	white matter hyperintensities			enlarged perivascular spaces				lacunes		cerebral microbleeds				SVD total score				Likert scale score
	Deep	Lateral ventricle	total score	Basal ganglia	centrum semiovale	hippocampus	total score	lacunes（Regardless of location.）	total score	Deep	Brain lobe	Infratentorial	total score		2	3	4	SWI	FLAIR	T2WI
number 001	1	2	0	3	3	3	1	0	0	1	0	0	1	2	1	0	0	5	4	2
number 002	2	2	1	3	4	1	1	0	0	1	1	1	1	3	1	1	0	5	4	3
number 003	1	2	0	3	3	3	1	0	0	0	0	0	0	1	0	0	0	5	5	5
number 004	3	2	1	4	4	1	1	1	1	1	1	0	1	4	1	1	1	5	5	5
number 005	1	2	0	4	4	3	1	0	0	1	1	0	1	2	1	0	0	5	5	5
number 006	1	1	0	3	3	2	1	0	0	1	0	0	1	2	1	0	0	5	5	5
number 007	3	3	1	3	3	2	1	1	1	1	1	1	1	4	1	1	1	5	5	5
number 008	1	0	0	2	3	1	1	0	0	0	0	0	0	1	0	0	0	5	5	5
number 009	0	1	0	4	4	3	1	1	1	1	1	1	1	3	1	1	0	3	5	5
number 010	2	2	1	3	4	3	1	0	0	0	1	0	1	3	1	1	0	2	5	5
number 011	1	1	1	3	4	3	1	1	1	1	1	1	1	4	1	1	1	5	5	5
number 012	1	1	0	4	3	1	1	0	0	0	0	0	0	1	0	0	0	5	5	5
number 013	1	1	1	4	4	2	1	1	1	0	1	1	1	4	1	1	1	5	5	5
number 014	2	2	1	4	3	2	1	0	0	1	0	0	1	3	0	1	0	5	5	5
number 015	0	1	0	2	1	2	1	0	0	0	0	0	0	1	0	0	0	5	5	5
number 016	1	2	0	4	4	1	1	0	0	0	0	1	1	2	1	0	0	5	5	5
number 017	0	0	0	2	3	2	1	0	0	0	0	0	0	1	0	0	0	5	5	5
number 018	3	3	1	3	3	2	1	1	1	1	0	1	1	4	1	1	1	5	5	5
number 019	0	2	0	4	4	3	1	0	0	0	1	0	1	2	1	0	0	5	5	5
number 020	1	1	0	2	3	1	1	0	0	0	0	0	0	1	0	0	0	5	5	5
number 021	0	1	0	4	4	2	1	0	0	1	0	0	1	2	1	0	0	5	5	5
number 022	0	1	0	3	3	2	1	1	1	0	0	1	1	3	1	1	0	5	5	5
number 023	1	2	1	3	4	3	1	1	1	0	0	0	0	3	1	1	0	5	5	5
number 024	1	1	0	3	3	2	1	0	0	0	0	0	0	1	0	0	0	5	5	5
number 025	0	1	0	2	2	1	1	0	0	0	0	0	0	1	0	0	0	5	5	5
number 026	1	1	0	3	3	2	1	0	0	0	0	0	0	1	0	0	0	5	5	5
number 027	0	1	0	2	3	1	1	0	0	0	0	0	0	1	0	0	0	5	5	1
number 028	1	1	0	3	4	3	1	0	0	0	0	0	0	1	0	0	0	5	5	5
number 029	0	1	0	2	3	2	1	0	0	0	1	1	1	2	1	0	0	5	5	5
number 030	1	1	0	3	3	2	1	0	0	0	1	0	1	2	1	0	0	5	5	5
number 031	0	2	0	2	3	2	1	1	1	1	1	1	1	3	1	1	0	5	5	5
number 032	1	0	0	3	3	2	1	0	0	0	0	0	0	1	0	0	0	5	5	2
number 033	1	3	1	4	3	3	1	0	0	0	1	0	1	3	1	1	0	5	5	5
number 034	3	3	1	4	3	3	1	1	1	1	0	0	1	4	1	1	1	3	5	3
number 035	0	1	0	3	3	2	1	0	0	0	0	0	0	1	0	0	0	3	5	3
number 036	1	1	0	2	3	1	1	0	0	1	0	0	1	2	1	0	0	5	5	5
number 037	0	1	0	4	4	3	1	1	1	1	1	1	1	3	1	1	0	5	5	5
number 038	1	2	0	3	4	3	1	0	0	1	0	0	1	2	1	0	0	5	5	5
number 039	0	1	0	4	4	3	1	1	1	0	0	0	0	2	1	0	0	2	5	5
number 040	1	1	0	2	3	1	1	0	0	0	0	0	0	1	0	0	0	5	5	5
number 041	3	3	1	3	4	3	1	0	0	0	1	0	1	3	2	1	0	4	5	5
number 042	0	1	0	3	3	2	1	0	0	0	0	0	0	1	0	0	0	5	5	5
number 043	1	1	0	2	2	1	1	0	0	1	0	0	1	2	1	0	0	5	5	5
number 044	0	1	0	3	4	2	1	0	0	0	1	0	1	2	1	0	0	5	5	2
number 045	2	1	1	3	4	2	1	0	0	1	0	1	1	3	1	1	0	4	5	4
number 046	0	1	0	3	4	3	1	0	0	0	0	1	1	2	1	0	0	5	5	5
number 047	1	2	0	2	3	1	1	0	0	0	1	0	1	2	1	0	0	5	5	2
number 048	1	1	0	3	3	2	1	0	0	0	0	0	0	1	0	0	0	2	3	3
number 049	0	1	0	2	3	1	1	0	0	0	1	0	1	2	1	0	0	5	5	5
number 050	2	1	1	4	4	2	1	1	1	1	0	0	1	4	1	1	1	5	5	5
number 051	0	2	0	4	4	3	1	1	1	0	0	1	1	3	1	1	0	5	5	5
number 052	1	2	0	3	3	1	1	0	0	0	0	0	0	1	0	0	0	5	5	5
number 053	1	2	1	3	3	3	1	0	0	1	0	0	1	3	1	1	0	5	5	5
number 054	1	2	0	2	3	1	1	0	0	0	1	0	1	2	1	0	0	5	5	5
number 055	1	2	1	4	4	3	1	0	0	0	0	0	0	2	1	0	0	3	5	3
number 056	2	3	1	4	4	3	1	1	1	1	1	1	1	4	1	1	1	5	5	5
number 057	0	1	0	2	4	2	1	0	0	0	0	0	0	1	0	0	0	5	5	5
number 058	2	2	1	3	3	2	1	0	0	0	0	0	0	2	1	0	0	5	5	5
number 059	0	1	0	3	4	1	1	0	0	0	0	0	0	1	0	0	0	5	5	5
number 060	2	2	1	4	4	3	1	1	1	1	0	0	1	4	1	1	1	5	5	4
number 061	0	0	0	2	2	0	1	0	0	0	0	0	0	1	0	0	0	2	3	3
number 062	2	2	1	3	4	3	1	1	1	0	0	0	0	3	1	1	0	4	5	3
number 063	0	1	0	3	4	2	1	1	1	0	0	0	0	2	1	0	0	5	5	5
number 064	1	1	0	3	4	3	1	0	0	0	0	0	0	1	0	0	0	5	5	5
number 065	0	0	0	2	4	1	1	0	0	0	0	0	0	1	0	0	0	5	5	5
number 066	0	1	0	1	3	1	1	0	0	0	0	0	0	1	0	0	0	2	4	4
number 067	1	3	1	4	3	3	1	1	1	1	1	1	1	4	1	1	1	5	5	4
number 068	1	1	0	3	4	2	1	0	0	0	0	0	0	1	0	0	0	5	5	5
number 069	1	3	1	4	4	2	1	0	0	0	0	0	0	2	1	0	0	5	5	5
number 070	1	1	0	3	3	3	1	0	0	0	0	0	0	1	0	0	0	5	5	5
number 071	0	1	0	3	3	1	1	0	0	0	0	0	0	1	0	0	0	5	5	5
number 072	0	1	0	2	3	2	1	0	0	0	0	0	0	1	0	0	0	5	5	5
number 073	0	2	0	3	4	2	1	1	1	0	0	0	0	2	1	0	0	5	5	5
number 074	1	0	0	3	4	1	1	0	0	0	0	0	0	1	0	0	0	5	5	5
number 075	1	1	1	3	4	1	1	1	1	1	0	0	1	4	1	1	1	5	5	5
number 076	1	1	0	3	4	1	1	1	1	0	0	0	0	2	1	0	0	5	5	5
number 077	1	3	1	4	4	2	1	1	1	1	1	1	1	4	1	1	1	5	5	5
number 078	1	1	0	3	4	2	1	1	1	1	0	0	1	3	1	1	0	5	5	5
number 079	0	1	0	4	2	3	1	1	1	1	0	1	1	3	1	1	0	5	5	5
number 080	3	3	1	4	4	3	1	1	1	1	1	1	1	4	1	1	1	5	5	5
number 081	0	0	0	3	2	1	1	0	0	0	0	0	0	1	0	0	0	5	5	4
number 082	1	1	0	2	4	3	1	0	0	0	0	1	1	2	1	0	0	5	5	5
number 083	0	1	0	3	4	2	1	0	0	0	0	0	0	1	0	0	0	5	5	5
number 084	1	2	0	4	4	2	1	0	0	0	0	0	0	1	0	0	0	2	5	5
number 085	0	0	0	1	2	2	1	0	0	0	0	0	0	1	0	0	0	5	5	5
number 086	3	3	1	4	4	3	1	1	1	1	1	0	1	4	1	1	1	5	5	5
number 087	1	0	1	3	3	3	1	0	0	0	0	0	0	2	1	0	0	5	5	5
number 088	2	2	1	4	4	3	1	1	1	0	0	0	0	3	1	1	0	2	5	2
number 089	0	1	0	4	3	3	1	1	1	0	0	0	0	2	1	0	0	5	5	3
number 090	2	2	1	4	4	2	1	1	1	1	1	1	1	4	1	1	1	5	5	5
number 091	1	3	1	2	3	1	1	1	1	0	0	0	0	3	1	1	0	5	5	5
number 092	1	1	0	3	3	2	1	0	0	0	0	0	0	1	0	0	0	5	5	5
number 093	0	2	0	4	3	3	1	0	0	1	1	1	1	3	1	1	0	5	5	5
number 094	1	2	1	4	4	3	1	1	1	1	1	0	1	4	1	1	1	3	5	5
number 095	0	0	0	2	3	2	1	0	0	0	0	0	0	1	0	0	0	5	4	4
number 096	0	0	0	2	2	1	1	0	0	0	0	0	0	1	0	0	0	5	5	5
number 097	1	1	0	2	3	2	1	0	0	0	0	0	0	1	0	0	0	5	5	5
number 098	0	0	0	2	3	2	1	0	0	0	0	0	0	1	0	0	0	5	5	5
number 099	2	2	1	3	4	3	1	0	0	0	0	1	1	3	1	1	0	5	5	5
number 100	0	1	0	2	4	3	1	0	0	1	1	0	1	2	1	0	0	5	5	5
number 101	1	0	0	3	3	3	1	0	0	0	0	0	0	1	0	0	0	5	5	5
number 102	0	1	0	3	3	3	1	0	0	1	0	0	1	2	1	0	0	5	5	4
number 103	1	2	0	4	4	3	1	1	1	1	1	1	1	3	1	1	0	5	5	5
number 104	2	2	1	4	4	3	1	1	1	1	1	1	1	4	1	1	1	5	5	5
number 105	0	0	0	3	3	3	1	0	0	0	0	0	0	1	0	0	0	5	5	5
number 106	1	0	0	2	4	1	1	0	0	1	0	0	1	2	1	0	0	4	5	5
number 107	0	1	0	3	3	2	1	0	0	0	0	0	0	1	0	0	0	5	5	5
number 108	0	1	0	2	3	3	1	0	0	0	0	0	0	1	0	0	0	5	5	5
number 109	0	1	0	3	4	2	1	0	0	0	0	0	0	1	0	0	0	5	3	2
number 110	0	1	0	2	3	1	1	0	0	1	0	0	1	2	1	0	0	5	5	2
number 111	0	1	0	2	3	2	1	0	0	0	0	0	0	1	0	0	0	2	5	3
number 112	2	2	1	3	4	1	1	1	1	1	0	0	1	4	1	1	1	4	5	5
number 113	2	3	1	3	4	3	1	1	1	0	0	0	0	3	1	1	0	4	5	4
number 114	1	3	1	3	4	3	1	1	1	1	0	0	1	4	1	1	1	5	5	4
number 115	3	3	1	4	4	3	1	1	1	1	0	0	1	4	1	1	1	5	5	5
number 116	1	1	1	3	4	3	1	1	1	1	0	1	1	4	1	1	1	5	5	3
number 117	2	2	1	3	4	2	1	1	1	1	1	0	1	4	1	1	1	5	5	2
number 118	1	1	1	3	3	2	1	1	1	0	0	0	0	3	1	1	0	5	5	5
number 119	3	2	1	3	4	2	1	1	1	1	1	1	1	4	1	1	1	5	5	2
number 120	1	3	1	3	4	2	1	0	0	1	0	0	1	3	1	1	0	5	5	5
number 121	1	3	1	4	4	3	1	1	1	1	1	1	1	4	1	1	1	5	5	5
number 122	2	2	1	4	3	2	1	1	1	1	1	0	1	4	1	1	1	3	5	3
number 123	0	1	0	2	2	1	1	0	0	0	0	0	0	1	0	0	0	4	5	4
number 124	2	3	1	3	4	2	1	0	0	1	1	1	1	3	1	1	0	5	5	4
number 125	1	1	1	2	3	3	1	1	1	1	0	0	1	4	1	1	1	5	5	5
number 126	1	1	0	4	4	3	1	0	0	1	0	0	1	2	1	0	0	5	3	3
number 127	0	1	0	3	3	3	1	0	0	0	0	0	0	1	0	0	0	5	5	5
number 128	1	1	0	3	3	2	1	0	0	0	0	1	1	2	1	0	0	4	4	4
number 129	1	3	1	4	4	3	1	1	1	1	1	0	1	4	1	1	1	5	5	3
number 130	1	3	1	4	4	3	1	1	1	1	1	1	1	4	1	1	1	5	5	5
number 131	1	3	1	4	4	3	1	1	1	1	1	0	1	4	1	1	1	5	5	5
number 132	1	3	1	4	4	3	1	1	1	1	1	0	1	4	1	1	1	5	5	2
number 133	1	1	1	4	4	3	1	1	1	1	1	0	1	4	1	1	1	5	5	5
number 134	1	2	1	4	4	3	1	1	1	1	0	1	1	4	1	1	1	5	5	5
number 135	1	2	1	4	4	2	1	1	1	1	0	1	1	4	1	1	1	5	5	3
number 136	1	2	1	4	4	2	1	1	1	1	1	0	1	4	1	1	1	5	5	5
number 137	2	1	1	3	4	2	1	0	0	0	0	1	1	3	1	1	0	4	5	5
number 138	0	1	0	2	2	1	1	1	1	0	0	1	1	3	1	1	0	5	5	5
number 139	1	1	0	3	3	1	1	0	0	0	1	0	1	2	1	0	0	5	5	4
number 140	0	1	0	2	2	1	1	1	1	0	1	0	1	3	1	1	0	5	5	5
number 141	1	1	0	2	4	2	1	0	0	1	1	0	1	2	1	0	0	5	5	5
number 142	0	0	0	2	3	3	1	1	1	0	0	0	0	2	1	0	0	5	5	5
number 143	3	2	1	3	4	2	1	1	1	1	1	1	1	4	1	1	1	5	5	5
number 144	0	1	0	4	2	0	1	1	1	0	0	0	0	2	1	0	0	4	4	4
number 145	1	2	0	3	3	3	1	0	0	1	0	0	1	2	1	0	0	3	5	5
number 146	0	1	0	3	1	2	1	1	1	1	0	0	1	3	1	1	0	5	5	4
number 147	0	1	0	2	3	2	1	0	0	0	0	0	0	1	0	0	0	5	5	5
number 148	0	0	0	2	0	2	1	1	1	0	1	0	1	3	1	1	0	5	4	4
number 149	1	1	0	2	3	2	1	0	0	0	0	0	0	1	0	0	0	5	5	5
number 150	1	1	1	3	3	3	1	1	1	0	1	0	1	3	1	1	0	5	5	5
number 151	1	1	0	3	3	2	1	0	0	1	1	1	1	2	1	0	0	5	5	5
number 152	0	1	0	4	4	3	1	1	1	1	1	1	1	3	1	1	0	5	5	5
number 153	2	2	1	4	4	2	1	1	1	1	0	0	1	4	1	1	1	5	5	5
number 154	0	1	0	2	3	3	1	1	1	1	0	0	1	3	1	1	0	5	5	5
number 155	1	2	0	4	4	3	1	1	1	1	1	0	1	3	1	1	0	5	5	5
number 156	0	1	0	3	4	3	1	1	1	1	0	0	1	3	1	1	0	5	5	5
number 157	2	3	1	4	4	3	1	1	1	1	1	1	1	4	1	1	1	5	5	5
number 158	1	1	1	3	4	3	1	1	1	0	0	0	0	3	1	1	0	5	5	5
number 159	1	2	1	3	4	2	1	1	1	0	0	0	0	3	1	1	0	4	3	3
number 160	0	0	0	2	3	2	1	0	0	0	0	0	0	1	0	0	0	4	5	5
number 161	3	3	1	4	4	3	1	1	1	1	1	1	1	4	1	1	1	3	5	5
number 162	0	1	0	3	4	2	1	1	1	1	1	1	1	3	1	1	0	5	5	5
number 163	1	1	0	3	3	3	1	1	1	0	0	1	1	3	1	1	0	5	5	5
number 164	0	2	0	3	4	3	1	1	1	1	1	0	1	3	1	1	0	3	5	5
number 165	1	2	0	2	3	2	1	0	0	1	0	0	1	2	1	0	0	5	5	5
number 166	0	2	0	3	3	3	1	1	1	0	0	0	0	2	1	0	0	3	5	5
number 167	2	1	1	2	4	2	1	1	1	0	0	0	0	3	1	1	0	5	5	3
number 168	1	1	1	4	4	3	1	1	1	1	0	0	1	4	1	1	1	5	5	5
number 169	1	1	0	2	3	3	1	0	0	0	0	0	0	1	0	0	0	5	5	5
number 170	0	2	0	4	4	3	1	1	1	1	0	0	1	3	1	1	0	5	5	5
number 171	1	1	0	2	3	2	1	1	1	0	0	0	0	2	1	0	0	5	5	5
number 172	0	1	0	3	3	2	1	0	0	1	0	0	1	2	1	0	0	5	5	4
number 173	0	1	0	2	3	3	1	0	0	0	0	0	0	1	0	0	0	5	5	5
number 174	1	3	1	3	3	3	1	1	1	0	1	0	1	4	1	1	1	5	5	5
number 175	1	0	0	3	3	3	1	0	0	1	0	0	1	2	1	0	0	5	5	5
number 176	0	1	0	2	2	3	1	1	1	0	0	1	1	3	1	1	0	5	5	5
number 177	1	2	0	3	3	2	1	1	1	1	1	0	1	3	1	1	0	5	5	5
number 178	1	2	1	2	3	2	1	1	1	0	1	0	1	4	1	1	1	5	5	5
number 179	2	2	1	3	4	2	1	1	1	0	0	0	0	3	1	1	0	5	5	5
number 180	0	2	0	3	3	2	1	1	1	1	0	0	1	3	1	1	0	5	5	5
number 181	1	2	0	4	4	3	1	1	1	1	1	1	1	3	1	1	0	4	3	5
number 182	0	1	0	2	4	2	1	0	0	1	1	0	1	2	1	0	0	5	5	5
number 183	2	2	1	4	4	3	1	0	0	0	1	0	1	3	1	1	0	5	5	5
number 184	1	1	1	2	4	3	1	1	1	1	0	0	1	4	1	1	1	5	4	4
number 185	2	2	1	3	4	3	1	1	1	1	0	0	1	4	1	1	1	5	5	3
number 186	0	1	0	4	4	3	1	1	1	1	1	1	1	3	1	1	0	5	5	5
number 187	1	1	0	2	4	2	1	0	0	1	0	0	1	2	1	0	0	5	5	5
number 188	1	3	1	4	4	3	1	1	1	0	1	0	1	4	1	1	1	5	5	5
number 189	1	1	0	3	4	3	1	0	0	1	1	0	1	2	1	0	0	5	5	5
number 190	0	1	0	3	3	3	1	0	0	1	0	0	1	2	1	0	0	5	5	5
number 191	1	1	0	2	3	2	1	0	0	0	0	0	0	1	0	0	0	1	5	3
number 192	1	3	1	4	4	3	1	1	1	1	1	0	1	4	1	1	1	5	5	5
number 193	1	1	0	3	3	2	1	1	1	0	0	0	0	2	1	0	0	5	5	4
number 194	0	1	0	3	3	3	1	0	0	1	1	0	1	2	1	0	0	5	5	5
number 195	1	1	0	3	3	3	1	0	0	0	0	0	1	1	0	0	0	5	5	5
number 196	0	1	0	3	2	3	1	1	1	0	0	0	0	2	1	0	0	5	5	5
number 197	2	2	1	4	4	3	1	0	0	1	0	0	1	3	1	1	0	5	5	5
number 198	0	1	0	3	3	2	1	1	1	0	0	0	0	2	1	0	0	5	5	5
number 199	1	1	0	2	3	2	1	0	0	0	0	0	0	1	0	0	0	5	5	5
number 200	1	2	1	2	3	3	1	1	1	1	1	0	1	4	1	1	1	5	5	5
number 201	1	1	0	3	4	1	1	0	0	0	0	0	0	1	0	0	0	5	5	5
number 202	0	2	0	4	4	3	1	0	0	1	0	0	1	2	1	0	0	5	5	4
number 203	1	1	0	3	3	1	1	1	1	0	0	0	0	2	1	0	0	5	5	5
number 204	0	1	0	2	4	3	1	1	1	1	1	0	1	3	1	1	0	5	5	5
number 205	2	1	1	2	3	2	1	1	1	0	0	0	0	3	1	1	0	2	5	2
number 206	1	2	1	4	4	1	1	1	1	1	1	0	1	4	1	1	1	5	5	5
number 207	2	1	1	3	3	1	1	0	0	1	1	0	1	3	1	1	0	3	5	4
number 208	1	3	1	4	4	2	1	1	1	1	1	1	1	4	1	1	1	5	5	4
number 209	1	1	0	3	3	3	1	0	0	0	0	0	0	1	0	0	0	5	5	5
number 210	1	3	1	3	4	2	1	0	0	1	0	1	1	3	1	1	0	5	5	5
number 211	1	1	0	3	4	3	1	0	0	1	0	0	1	2	1	0	0	5	5	5
number 212	1	2	1	4	4	1	1	0	0	1	0	1	1	3	1	1	0	5	5	5
number 213	1	1	0	3	3	2	1	1	1	1	0	0	1	3	1	1	0	3	5	4
number 214	0	0	0	3	3	2	1	0	0	0	0	0	0	1	0	0	0	5	5	5
number 215	2	2	1	3	4	2	1	1	1	0	0	0	0	3	1	1	0	2	4	4
number 216	0	1	0	2	3	1	1	0	0	1	0	0	1	2	1	0	0	5	5	5
number 217	3	1	1	2	3	2	1	1	1	0	0	0	0	3	1	1	0	5	5	5
number 218	0	0	0	3	4	2	1	0	0	1	0	0	1	2	1	0	0	5	5	5
number 219	2	1	1	3	4	2	1	0	0	1	1	1	1	3	1	1	0	5	5	3
number 220	0	0	0	2	4	2	1	1	1	0	1	0	1	3	1	1	0	5	5	5
number 221	1	0	0	2	4	2	1	0	0	0	0	0	0	1	0	0	0	5	5	5
number 222	1	2	1	4	4	3	1	1	1	0	0	0	0	3	1	1	0	5	5	5
number 223	1	2	0	3	3	2	1	0	0	0	0	0	0	1	0	0	0	3	4	5
number 224	1	3	1	4	4	3	1	1	1	1	1	0	1	4	1	1	1	5	5	5
number 225	3	2	1	4	4	3	1	1	1	1	1	1	1	4	1	1	1	4	5	3
number 226	0	1	0	3	3	2	1	0	0	0	0	0	0	1	0	0	0	5	5	5
number 227	2	1	1	3	4	2	1	1	1	0	1	0	1	4	1	1	1	4	5	4
number 228	0	1	0	4	4	3	1	0	0	1	0	0	1	2	1	0	0	5	3	2
number 229	1	1	0	3	4	3	1	0	0	1	0	0	1	2	1	1	0	3	4	5
number 230	1	3	1	4	3	2	1	1	1	1	0	1	1	4	1	1	1	5	5	5
number 231	2	3	1	4	4	2	1	0	0	1	1	0	1	3	1	1	0	5	5	5
number 232	1	3	1	3	3	1	1	1	1	1	0	1	1	4	1	1	1	5	5	5
number 233	3	2	1	3	4	3	1	1	1	1	1	1	1	4	1	1	1	4	5	4
number 234	1	2	1	3	3	3	1	0	0	1	0	0	1	3	1	1	0	5	5	4
number 235	1	1	1	3	3	3	1	1	1	1	0	0	1	4	1	1	1	5	5	5
number 236	0	1	0	3	3	2	1	0	0	1	1	0	1	2	1	0	0	5	5	4
number 237	1	2	0	3	3	2	1	1	1	0	0	0	0	2	1	0	0	5	5	5
number 238	1	2	1	4	4	3	1	0	0	1	0	0	1	3	1	1	0	5	5	5
number 239	2	3	1	3	4	3	1	1	1	1	0	1	1	4	1	1	1	5	5	5
number 240	1	3	1	2	4	2	1	1	1	1	0	1	1	4	1	1	1	5	5	5
number 241	2	2	1	4	4	3	1	1	1	1	0	0	1	4	1	1	1	3	5	5
