# Supplementary material for: Lacunes and type 2 diabetes mellitus have a joint effect on cognitive impairment: a retrospective study
Source: PeerJ. 2022 Mar 3;10:e13069. doi: 10.7717/peerj.13069 (PMC8898547; doi:10.7717/peerj.13069)
Supplement: Supplemental Information 2 [file peerj-10-13069-s002.xlsx]

## Sheet: data 
number	MMSE Grouping	gender	Age	Smoking	Education Group	Diabetes	Hyperlipidemia	Hypertension	Lacunar Score	Total Small Vessel Disease Score	total SVD ≧2	total SVD ≧3
Sub004	0	0	58	0	1	0	0	1	1	4	1	1
Sub032	0	0	44	1	0	0	1	0	0	1	0	0
Sub045	0	0	66	0	1	0	0	0	0	2	1	0
Sub050	0	0	61	1	1	0	0	0	0	2	1	0
Sub055	0	0	57	0	1	0	1	0	0	2	1	0
Sub066	0	0	52	1	0	0	0	0	0	1	0	0
Sub077	0	0	60	1	0	0	0	1	1	4	1	1
Sub078	0	0	67	0	1	0	0	1	1	4	1	1
Sub097	0	0	29	0	1	0	0	1	0	1	0	0
Sub099	0	0	50	1	0	0	1	0	0	1	0	0
Sub113	0	1	78	0	1	0	1	1	1	4	1	1
Sub114	0	0	59	1	1	0	0	1	1	3	1	1
Sub212	0	0	78	0	1	1	0	0	0	3	1	1
Sub232	0	0	64	0	0	1	1	0	0	3	1	1
Sub240	0	0	55	0	0	1	0	1	1	4	1	1
Sub002	0	0	68	0	1	0	0	1	1	4	1	1
Sub003	0	0	80	1	0	0	0	1	1	3	1	1
Sub005	0	0	79	0	1	0	0	0	1	3	1	1
Sub006	0	1	75	0	0	0	1	1	0	2	1	0
Sub007	0	0	65	0	0	0	0	1	1	4	1	1
Sub008	0	0	51	1	1	0	0	0	0	1	0	0
Sub009	0	1	79	0	1	0	1	1	1	3	1	1
Sub010	0	0	64	1	0	0	1	1	1	4	1	1
Sub011	0	1	59	0	1	0	1	1	1	4	1	1
Sub012	0	0	74	0	0	0	0	1	1	2	1	0
Sub013	0	0	66	1	1	0	0	1	1	4	1	1
Sub014	0	0	78	0	1	0	1	1	1	4	1	1
Sub015	0	1	58	0	0	0	1	0	0	1	0	0
Sub016	0	0	71	0	1	0	1	1	1	4	1	1
Sub017	0	0	44	1	1	0	0	0	0	1	0	0
Sub018	0	0	70	1	1	0	0	1	1	4	1	1
Sub019	0	1	65	0	1	0	1	1	0	2	1	0
Sub021	0	0	63	1	0	0	1	0	0	2	1	0
Sub023	0	0	80	0	0	0	0	1	1	3	1	1
Sub024	0	1	45	0	1	0	1	0	0	1	0	0
Sub025	0	1	61	0	1	0	1	0	0	1	0	0
Sub026	0	0	41	1	0	0	0	1	0	1	0	0
Sub027	0	0	67	1	0	0	0	1	0	1	0	0
Sub028	0	0	71	0	1	0	0	1	0	1	0	0
Sub029	0	0	52	0	0	0	0	0	0	2	1	0
Sub030	0	1	62	0	1	0	0	1	0	2	1	0
Sub031	0	0	68	0	0	0	1	1	1	3	1	1
Sub033	0	0	72	0	1	0	0	1	0	3	1	1
Sub034	0	0	79	1	0	0	0	1	1	4	1	1
Sub035	0	0	74	0	0	0	1	0	0	1	0	0
Sub036	0	1	51	0	0	0	0	0	0	2	1	0
Sub038	0	0	80	0	1	0	0	0	1	3	1	1
Sub039	0	1	81	0	0	0	1	1	1	2	1	0
Sub040	0	0	58	1	0	0	0	0	0	1	0	0
Sub041	0	0	53	0	0	0	0	1	0	1	0	0
Sub042	0	1	72	0	0	0	0	0	1	3	1	1
Sub043	0	0	49	0	0	0	1	0	0	1	0	0
Sub044	0	1	63	0	1	0	0	0	0	2	1	0
Sub047	0	0	32	0	1	0	0	1	0	2	1	0
Sub048	0	1	80	0	0	0	1	1	1	3	1	1
Sub049	0	0	71	0	1	0	0	1	0	1	0	0
Sub051	0	0	57	0	1	0	0	1	1	4	1	1
Sub052	0	0	74	0	0	0	0	1	1	3	1	1
Sub053	0	0	58	0	0	0	0	1	0	1	0	0
Sub056	0	0	79	1	0	0	1	1	0	2	1	0
Sub057	0	0	68	1	1	0	0	0	1	4	1	1
Sub058	0	0	42	1	1	0	1	0	0	1	0	0
Sub059	0	0	63	1	0	0	0	1	0	2	1	0
Sub060	0	0	58	1	0	0	0	0	0	1	0	0
Sub061	0	0	78	1	0	0	0	1	1	4	1	1
Sub064	0	0	50	0	0	0	0	1	1	2	1	0
Sub065	0	0	52	0	0	0	0	1	0	1	0	0
Sub068	0	0	72	1	0	0	0	1	1	4	1	1
Sub071	0	0	53	0	0	0	0	0	0	1	0	0
Sub072	0	0	61	0	0	0	0	0	0	1	0	0
Sub073	0	0	49	0	0	0	0	0	0	1	0	0
Sub076	0	0	48	1	1	0	1	1	1	4	1	1
Sub079	0	0	60	0	0	0	0	1	1	3	1	1
Sub080	0	0	44	0	0	0	0	1	1	3	1	1
Sub081	0	0	77	1	0	0	0	1	1	4	1	1
Sub082	0	1	42	0	1	0	0	0	0	1	0	0
Sub084	0	1	65	0	0	0	0	1	0	1	0	0
Sub085	0	0	54	0	0	0	0	1	0	1	0	0
Sub086	0	1	58	0	0	0	0	0	0	1	0	0
Sub087	0	1	65	1	0	0	0	0	1	4	1	1
Sub088	0	1	42	0	1	0	0	1	0	2	1	0
Sub091	0	0	72	0	1	0	1	1	1	4	1	1
Sub092	0	0	64	1	1	0	1	0	1	3	1	1
Sub094	0	0	51	0	1	0	0	1	0	3	1	1
Sub095	0	0	66	0	0	0	1	0	0	3	1	1
Sub096	0	0	70	0	0	0	1	1	0	1	0	0
Sub098	0	1	51	0	0	0	0	0	0	1	0	0
Sub100	0	1	68	0	0	0	0	1	0	3	1	1
Sub101	0	0	61	0	0	0	0	1	0	2	1	0
Sub102	0	1	42	0	1	0	0	0	0	1	0	0
Sub103	0	0	58	1	1	0	0	0	0	2	1	0
Sub104	0	0	45	0	0	0	0	1	1	3	1	1
Sub106	0	0	52	0	1	0	0	1	0	1	0	0
Sub107	0	0	51	1	0	0	1	1	0	1	0	0
Sub108	0	1	70	0	0	0	1	1	0	1	0	0
Sub109	0	0	48	0	0	0	1	1	0	1	0	0
Sub111	0	0	67	1	1	0	0	1	0	2	1	0
Sub112	0	0	47	1	0	0	0	1	0	1	0	0
Sub116	0	0	85	0	0	1	0	1	1	4	1	1
Sub117	0	1	45	0	0	1	0	1	1	4	1	1
Sub118	0	1	68	0	0	1	0	1	1	4	1	1
Sub119	0	1	62	0	0	1	1	0	1	3	1	1
Sub120	0	0	83	1	0	1	0	1	1	4	1	1
Sub121	0	1	67	0	0	1	1	1	0	3	1	1
Sub122	0	0	60	1	0	1	1	1	1	4	1	1
Sub124	0	1	69	0	0	1	1	1	0	1	0	0
Sub129	0	0	67	0	0	1	0	1	0	1	0	0
Sub134	0	0	70	0	0	1	0	1	1	4	1	1
Sub135	0	1	48	0	0	1	1	1	1	4	1	1
Sub136	0	0	65	0	0	1	0	1	1	4	1	1
Sub143	0	0	53	1	1	1	0	1	1	2	1	0
Sub162	0	0	68	0	0	1	1	1	1	1	0	0
Sub164	0	0	55	1	1	1	0	1	1	3	1	1
Sub165	0	0	58	0	0	1	0	1	1	3	1	1
Sub166	0	0	58	1	1	1	0	1	1	4	1	1
Sub167	0	0	63	1	0	1	0	1	1	2	1	0
Sub168	0	1	55	0	0	1	1	1	1	2	1	0
Sub170	0	1	53	0	1	1	0	1	0	1	0	0
Sub172	0	0	46	1	0	1	1	1	1	3	1	1
Sub173	0	0	46	1	1	1	1	1	0	2	1	0
Sub174	0	1	59	0	0	1	0	0	1	2	1	0
Sub175	0	0	64	1	0	1	1	1	1	4	1	1
Sub176	0	0	62	0	0	1	0	0	0	2	1	0
Sub184	0	1	74	0	0	1	0	1	0	3	1	1
Sub185	0	0	53	1	1	1	0	1	1	4	1	1
Sub186	0	1	64	0	0	1	1	1	1	4	1	1
Sub187	0	0	63	1	0	1	0	1	1	3	1	1
Sub191	0	0	55	1	0	1	1	0	0	2	1	0
Sub192	0	0	58	1	0	1	0	1	0	1	0	0
Sub194	0	1	71	0	0	1	0	1	0	2	1	0
Sub195	0	0	50	1	1	1	0	1	0	2	1	0
Sub196	0	1	55	0	1	1	1	1	0	2	1	0
Sub197	0	1	65	0	1	1	0	1	1	2	1	0
Sub200	0	1	73	0	0	1	0	0	0	1	0	0
Sub202	0	1	66	0	0	1	0	0	0	1	0	0
Sub203	0	0	50	0	1	1	0	1	0	2	1	0
Sub204	0	1	65	0	0	1	0	1	1	2	1	0
Sub207	0	0	60	0	1	1	0	1	1	4	1	1
Sub211	0	1	65	0	0	1	0	1	0	3	1	1
Sub214	0	1	66	0	0	1	1	1	0	3	1	1
Sub215	0	0	60	1	0	1	1	0	0	1	0	0
Sub217	0	1	69	0	1	1	0	1	0	2	1	0
Sub219	0	1	69	0	0	1	0	1	0	2	1	0
Sub222	0	0	54	1	1	1	0	1	0	1	0	0
Sub224	0	1	67	0	0	1	0	1	0	2	1	0
Sub227	0	0	53	1	1	1	0	1	0	1	0	0
Sub230	0	0	57	0	0	1	0	0	0	2	1	0
Sub231	0	0	55	0	1	1	0	1	1	4	1	1
Sub233	0	1	64	0	0	1	0	1	1	4	1	1
Sub234	0	1	67	0	1	1	0	1	1	4	1	1
Sub237	0	1	75	0	0	1	0	0	0	2	1	0
Sub238	0	0	75	0	0	1	0	1	0	3	1	1
Sub239	0	0	79	0	0	1	0	1	0	3	1	1
Sub241	0	0	57	0	0	1	0	1	1	4	1	1
Sub242	0	0	71	0	0	1	0	1	1	4	1	1
Sub156	1	0	67	0	1	1	0	1	1	4	1	1
Sub001	1	1	64	0	0	0	0	1	1	3	1	1
Sub020	1	0	53	0	1	0	0	1	0	1	0	0
Sub022	1	1	38	0	1	0	1	1	1	3	1	1
Sub037	1	0	57	1	1	0	0	1	1	3	1	1
Sub046	1	0	54	0	1	0	1	1	0	3	1	1
Sub054	1	0	66	0	0	0	0	1	0	3	1	1
Sub062	1	1	53	0	0	0	1	1	0	1	0	0
Sub063	1	0	63	0	1	0	1	1	0	2	1	0
Sub067	1	1	43	0	0	0	0	0	0	1	0	0
Sub070	1	1	82	0	0	0	0	0	0	2	1	0
Sub074	1	0	70	0	0	0	0	1	1	2	1	0
Sub075	1	1	50	0	1	0	0	0	0	1	0	0
Sub083	1	1	66	0	1	0	1	0	0	2	1	0
Sub089	1	0	67	1	1	0	1	1	1	3	1	1
Sub090	1	0	61	0	0	0	1	1	1	2	1	0
Sub093	1	0	46	1	1	0	0	1	0	1	0	0
Sub110	1	1	64	0	1	0	1	1	0	1	0	0
Sub115	1	1	68	0	0	1	1	1	1	4	1	1
Sub123	1	0	79	0	1	1	0	0	1	3	1	1
Sub125	1	1	64	0	0	1	0	1	1	4	1	1
Sub126	1	1	86	0	0	1	1	1	1	4	1	1
Sub127	1	0	73	0	0	1	0	1	1	3	1	1
Sub128	1	1	60	0	0	1	0	0	0	1	0	0
Sub130	1	1	78	0	0	1	1	1	1	4	1	1
Sub131	1	0	67	0	1	1	0	1	1	4	1	1
Sub132	1	0	61	0	1	1	0	1	1	4	1	1
Sub133	1	0	69	1	0	1	1	1	1	4	1	1
Sub137	1	0	53	0	0	1	0	1	1	4	1	1
Sub151	1	1	66	0	0	1	0	1	1	3	1	1
Sub152	1	0	64	0	1	1	0	1	1	3	1	1
Sub153	1	0	59	1	0	1	0	1	1	3	1	1
Sub154	1	0	79	0	0	1	0	1	1	4	1	1
Sub155	1	1	71	0	1	1	0	1	1	3	1	1
Sub157	1	1	63	0	1	1	0	1	1	3	1	1
Sub158	1	0	83	1	0	1	1	1	1	4	1	1
Sub159	1	0	57	1	1	1	0	0	1	3	1	1
Sub160	1	1	64	0	0	1	1	1	1	3	1	1
Sub161	1	0	49	0	1	1	1	1	0	1	0	0
Sub163	1	0	60	1	1	1	0	1	1	3	1	1
Sub169	1	1	69	0	0	1	0	1	1	4	1	1
Sub171	1	1	68	0	0	1	0	1	1	3	1	1
Sub177	1	0	54	1	1	1	0	0	1	3	1	1
Sub178	1	1	78	0	0	1	0	1	1	4	1	1
Sub179	1	1	63	0	0	1	0	1	1	4	1	1
Sub180	1	1	69	0	0	1	1	1	1	3	1	1
Sub181	1	0	68	1	0	1	0	1	1	3	1	1
Sub182	1	0	63	1	1	1	0	1	1	4	1	1
Sub183	1	1	52	0	1	1	0	1	0	2	1	0
Sub188	1	0	47	0	0	1	1	1	0	2	1	0
Sub189	1	0	72	1	1	1	1	1	1	4	1	1
Sub190	1	1	70	0	0	1	0	1	0	2	1	0
Sub193	1	1	64	0	1	1	0	1	1	4	1	1
Sub198	1	0	63	0	1	1	0	1	1	4	1	1
Sub199	1	0	80	0	1	1	1	1	1	2	1	0
Sub201	1	1	48	0	0	1	0	1	1	4	1	1
Sub206	1	1	76	0	0	1	0	0	1	4	1	1
Sub208	1	0	71	1	1	1	1	1	0	3	1	1
Sub209	1	0	70	1	1	1	1	1	1	4	1	1
Sub210	1	1	52	0	0	1	0	1	0	1	0	0
Sub213	1	1	63	0	1	1	0	1	0	3	1	1
Sub216	1	0	75	0	0	1	1	0	1	2	1	0
Sub218	1	0	50	0	0	1	1	0	1	3	1	1
Sub220	1	1	72	0	0	1	0	0	0	2	1	0
Sub221	1	1	53	0	0	1	1	1	1	3	1	1
Sub223	1	1	67	0	0	1	1	1	1	3	1	1
Sub225	1	0	81	0	1	1	0	1	1	4	1	1
Sub226	1	0	76	0	0	1	1	1	1	4	1	1
Sub228	1	1	68	0	0	1	0	1	1	4	1	1
Sub229	1	0	73	1	1	1	1	1	0	2	1	0
Sub235	1	0	74	0	0	1	1	1	0	3	1	1
Sub236	1	0	68	0	0	1	0	1	0	2	1	0
